# Supplementary material
Source: Springer Nature journal article supplement (https://www.springermedizin.de/resource/supplementary/12933_2014_836_MOESM1_ESM.pdf/9539354)
Supplement: MOESM1 [file 9539354]

# Posttranslational modifications in MGP

**dephospho-uncarboxylated MGP  
(dp-ucMGP)**

carboxylation

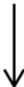

**desphospho-carboxylated MGP  
(dp-cMGP)**

phosphorylation

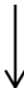

**mature MGP  
(p-cMGP)**
